# Supplementary material for: Comparative proteomics reveals that central metabolism changes are associated with resistance against Sporisorium scitamineum in sugarcane
Source: BMC Genomics. 2016 Oct 12;17:800. doi: 10.1186/s12864-016-3146-8 (PMC5062822; doi:10.1186/s12864-016-3146-8)
Supplement: Additional file 2: Table S1. — The primers used for RT-qPCR amplification of correlated differentially expressed genes. (DOCX 23 kb) [file 12864_2016_3146_MOESM2_ESM.docx]

**Comparative proteomics reveals that central metabolism changes are associated with resistance against *Sporisorium scitamineum* in sugarcane**

**Yachun** **Su1**

**E-mail:** **[syc2009mail@163.com](mailto:syc2009mail@163.com)**

**Liping Xu1***

**E-mail:** [**xlpmail@126.com**](mailto:xlpmail@126.com)

**Zhuqing Wang1**

**E-mail:** [**zhuqingemail@163.com**](mailto:zhuqingemail@163.com)

**Qiong Peng1**

**E-mail:** [**pengqiongfj@163.com**](mailto:pengqiongfj@163.com)

**Yuting Yang1**

**E-mail:** **[yytjiayou@126.com](mailto:yytjiayou@126.com)**

**Yun** **Chen1**

**E-mail:** **[sweetchenyun@163.com](mailto:sweetchenyun@163.com)**

**Youxiong Que1,2***

**E-mail:** [**queyouxiong@126.com**](mailto:queyouxiong@126.com)

1Key Laboratory of Sugarcane Biology and Genetic Breeding, Ministry of Agriculture, Fujian Agriculture and Forestry University, Fuzhou 350002, China

2Guangxi Collaborative Innovation Center of Sugarcane Industry, Guangxi University, Nanning 530005, China

***Correspondence should be addressed to** [xlpmail@126.com](mailto:xlpmail@126.com)and[queyouxiong@126.com](mailto:queyouxiong@126.com)

**The full postal address of the submitting author Youxiong Que is as follows:** Key Laboratory of Sugarcane Biology and Genetic Breeding, Ministry of Agriculture, Fujian Agriculture and Forestry University, Fuzhou 350002, China

**Additional file 2: Table S1** The primers used for RT-qPCR amplification of correlated differentially expressed genes

| **Gene Name** | **ID name** | **Forward primer (5’-3’)** | **Reverse primer (5’-3’)** |
| --- | --- | --- | --- |
| *beta-1,3-glucanase* | Sugarcane_Unigene_BMK.34407 | CCATGCTTGCACTGGCATTGCTT | TTGTCGCCGTTCACGCCGTAG |
| *POD* | Sugarcane_Unigene_BMK.59640 | CAGAGCGTGGTCGTCATAG | GAAGCAGTCGTGGAAGAAGAG |
| *POD* | gi34949353 | CATCCTCCGCCTCTTCTT | CATCTTCTCGCCCTGGAA |
| *xylanase* | Sugarcane_Unigene_BMK.55512 | ACGATTACTCCGCCTACAC | TGGTGGTCTTGTTGAGGTT |
| *PR1* | gi36048114 | GTCAGGCAGTTCAACTTCAC | TGTCCAGGTCCAGGAAATC |
| *PR1* | Sugarcane_Unigene_BMK.51436 | CAGCATCAGGCAGTTCAAC | TGTCCAGGTCCAGGAAATC |
| *HSP* | Sugarcane_Unigene_BMK.42413 | CGCAAGCACAAGAAGGAC | GGGTGATGGTGGTGTAGAA |
| *Lectin* | Sugarcane_Unigene_BMK.84564 | CCAACTGGTCCGTGTCATA | GTGGAGTCTCGTCTTCATCA |
| *CaM* | gi34970702 | AAGATGAAGGACACCGACTC | CAGCCGAGATGAAACCATTC |
| *CML* | Sugarcane_Unigene_BMK.53658 | CATTCCGCATTATTGACCAAGA | GCTAGTCCTCCTCATCATCC |
| *CaMBP* | Sugarcane_Unigene_BMK.57746 | TGGTGAATGATGTGGAAGAGA | CAGGCTTAGTTGAGAATGAAGAC |
| *CBL* | Sugarcane_Unigene_BMK.25350 | TGCCTGGATGGAGTGAAG | GCTCATACAACGCCTCAAC |
| *MDAR* | Sugarcane_Unigene_BMK.69164 | TCGCCATCATCTCCAAGG | GTACTCAGGATCAGTTCAATGC |
| *Prx* | Sugarcane_Unigene_BMK.42965 | CCTCCACCTCTGCGTTCC | CTTGCCGTTCTGGTCCTTGA |
| *RPM1* | Sugarcane_Unigene_BMK.66398 | GGATGACTGAGGAGAAGAAGAT | CACTCTGGTGGAGAATTGTTG |
| *PBS1* | Sugarcane_Unigene_BMK.67719 | TGACTGCTCTGAGGTGTATC | CTCCTGCCACTGTTATTCTTG |
| *HSP90* | Sugarcane_Unigene_BMK.42924 | TTGTTAAGGGTATTGTTGACTCTG | ACACTTCTTCACGAGGTTCT |
| *HSP90* | gi35034166 | CCTCATCATCAACACCTTCTACTC | ACTTGTCCGTCAGGCTCTC |
| *PP2C* | Sugarcane_Unigene_BMK.63236 | ATGTGGTCTCTAACGAGGAAG | GTTATGTTGTCACTGCTCTCC |
| *ACO* | gi35014290 | CACCAAGTTCGCCATGTAC | CTGGAGGAGCAGGATGATG |
| *EIN3* | Sugarcane_Unigene_BMK.65773 | CCTCGTTCGTCAGTCCAA | GCTCCTCTTCCTGCTTGA |
| *GID1* | Sugarcane_Unigene_BMK.57806 | CCATCCTCGTCTACTACCAC | TGTTGAAGTAGGCGTGGAA |
| *GAPDH* | - | CACGGCCACTGGAAGCA | TCCTCAGGGTTCCTGATGCC |

Notes: *POD*, peroxidase; *PR1*, pathogenesis-related protein 1; *HSP*, heat shock protein; *CaM*, calmodulin; *CML*, calcium-binding protein; *CaMBP*, calmodulin-binding protein; *CBL*, calcineurin B-like protein; *MDAR*, monodehydroascorbic acid reductase; *Prx*, peroxiredoxin; *RPM1*, effector-triggered immune receptor; *PBS1*, serine-threonine kinase; *HSP90*, heat shock protein 90; *PP2C*, protein phosphatase 2C; *ACO*, 1-aminocycopropane-1-carbosylic acid oxidase; *EIN3*, ethylene sensitive 3; *GID1*, gibberellic acid-insensitive dwarf 1; *GAPDH*, glyceraldehyde-3-phosphate dehydrogenase.
